# Supplementary material for: Highly sensitive and selective fluorometric off–on K+ probe constructed via host–guest molecular recognition and aggregation-induced emission
Source: Royal Society of Chemistry journal article supplement (doi:10.1039/c2jm16510d), 2012-01-01
Supplement: c2jm16510d.pdf [file c2jm16510d.pdf]

# **Highly Sensitive and Selective Fluorometric Off-On K<sup>+</sup> Probes Constructed via Host-Guest Molecular Recognition and Aggregation-Induced Emission**

**Xiaorui Wang, Jinming Hu, Tao Liu, Guoying Zhang,\* and Shiyong Liu\***

*CAS Key Laboratory of Soft Matter Chemistry, Department of Polymer Science and Engineering,  
Hefei National Laboratory for Physical Sciences at the Microscale, University of Science and  
Technology of China, Hefei, Anhui 230026, China*

\* To whom correspondence should be addressed.  
E-mail: sliu@ustc.edu.cn; gyzhang@ustc.edu.cn

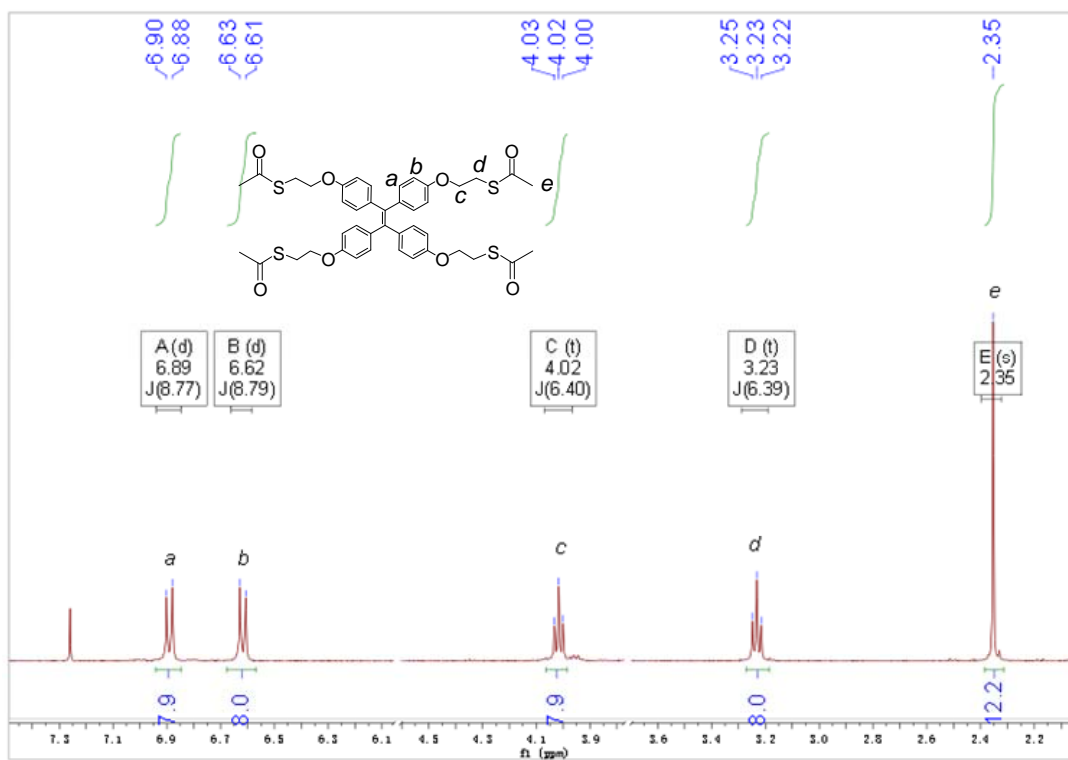

**Figure S1.**  $^1\text{H}$  NMR spectrum recorded for **2** in  $\text{CDCl}_3$ .

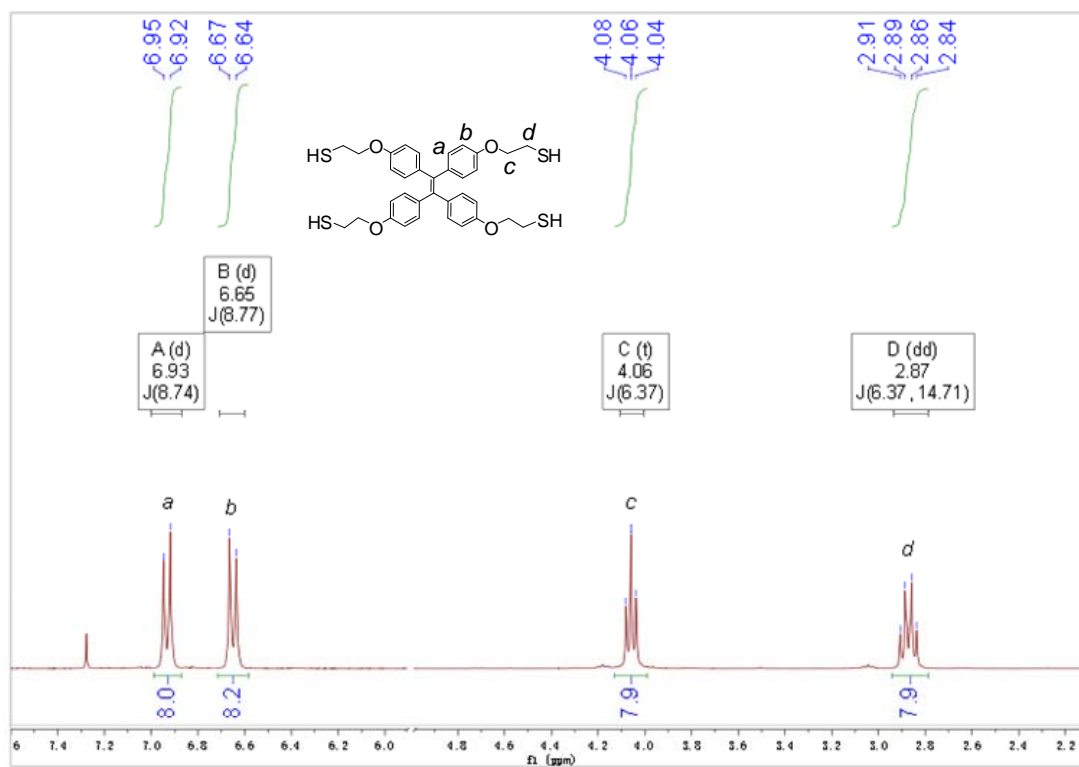

**Figure S2.**  $^1\text{H}$  NMR spectrum recorded for TPE-(SH)<sub>4</sub> (3) in CDCl<sub>3</sub>.

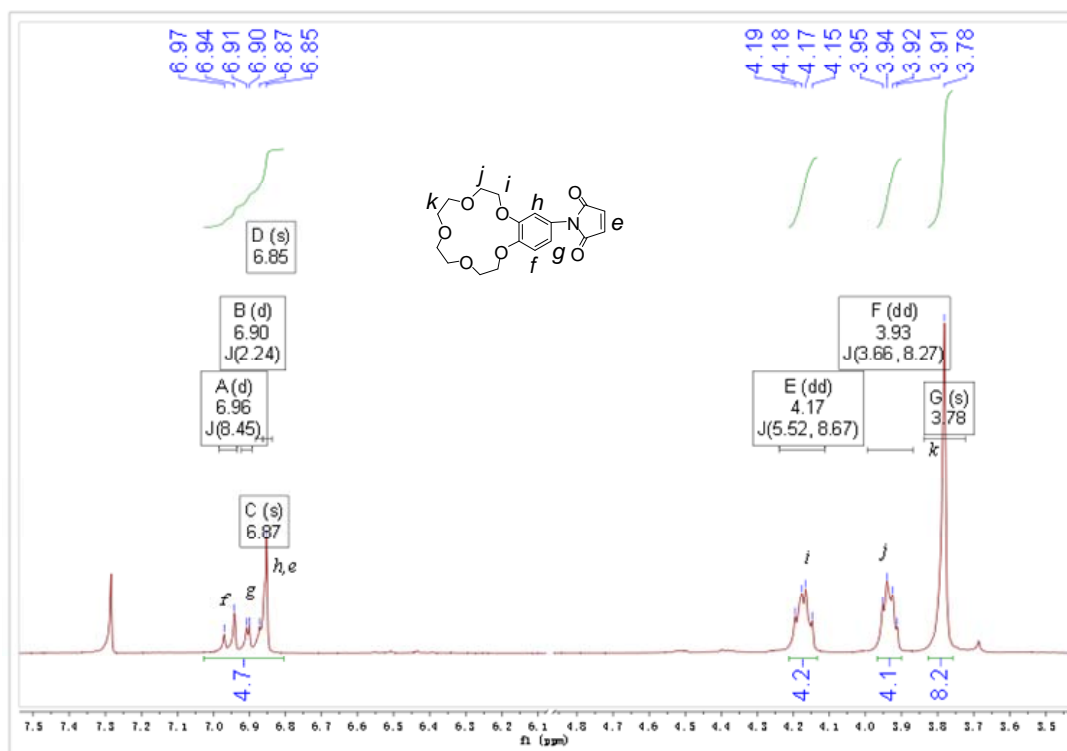

**Figure S3.** <sup>1</sup>H NMR spectrum recorded for B15C5-MI (**6**) in CDCl<sub>3</sub>.

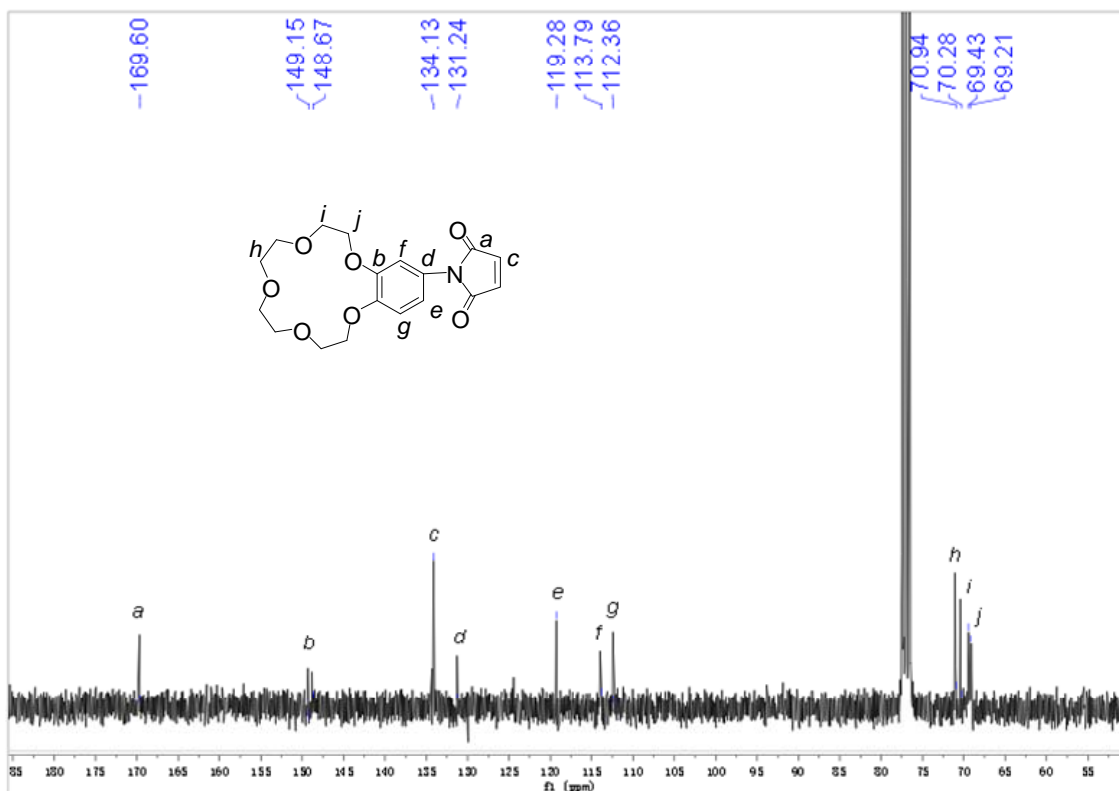

**Figure S4.**  $^{13}\text{C}$  NMR spectrum recorded for B15C5-MI (**6**) in  $\text{CDCl}_3$ .

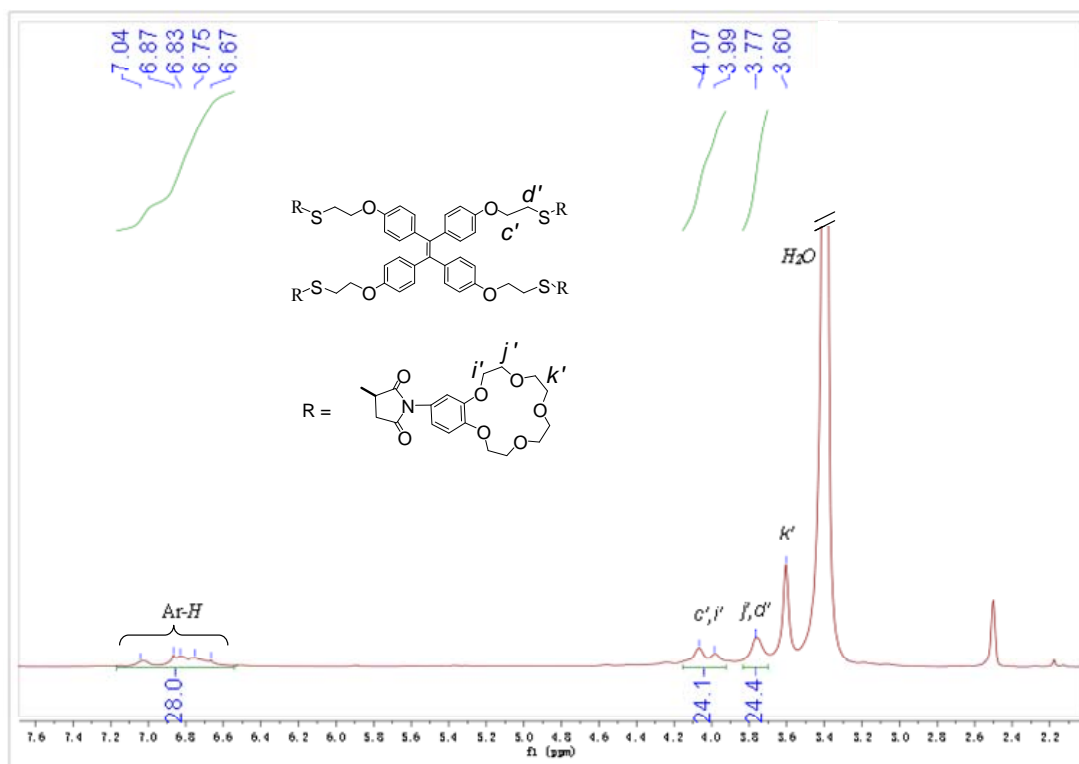

**Figure S5.**  $^1\text{H}$  NMR spectrum recorded for TPE-(B15C5) $_4$  in  $\text{DMSO-}d_6$ .

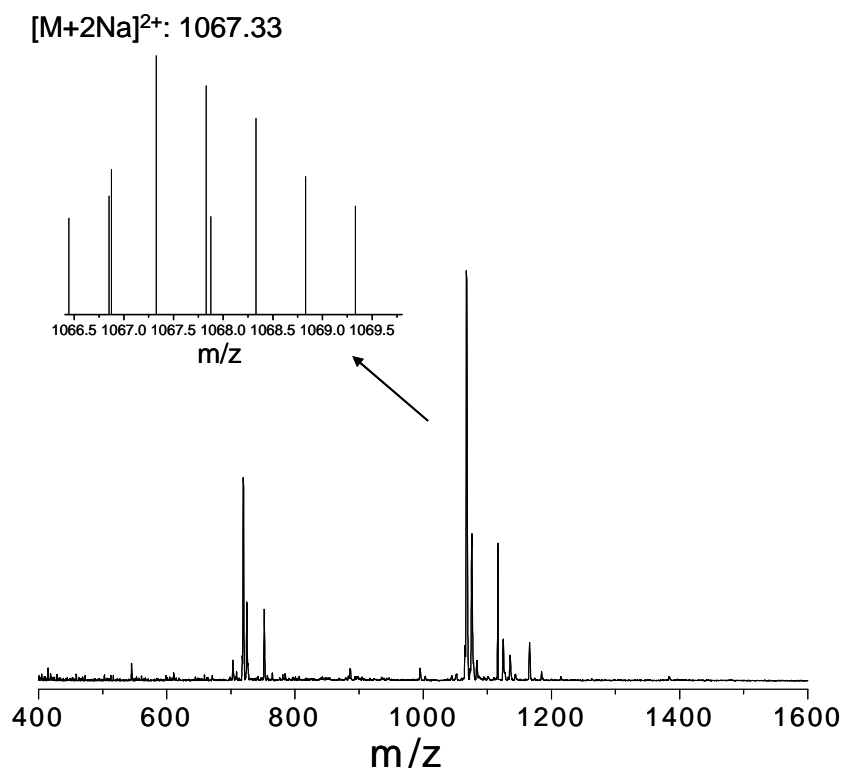

**Figure S6.** ESI-MS recorded for TPE-(B15C5)<sub>4</sub> (7).

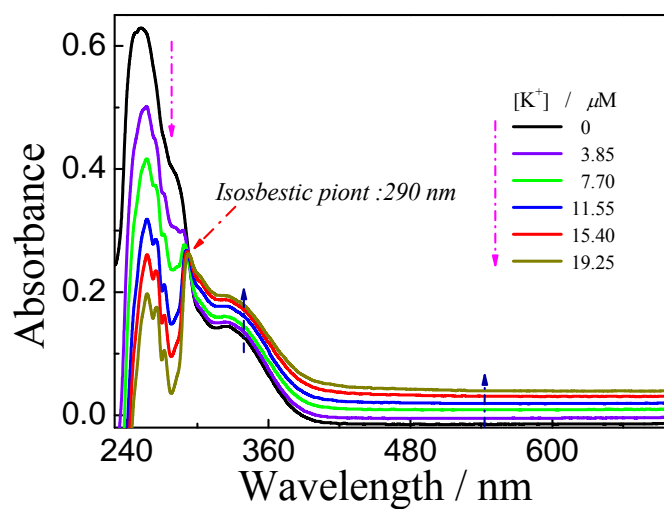

**Figure S7.** UV-Vis absorption spectra recorded for TPE-(B15C5)<sub>4</sub> in THF upon gradual addition of K<sup>+</sup> ions (0-20 μM, KSCN). The final TPE-(B15C5)<sub>4</sub> concentrations were fixed at 9.6 μM in all cases.



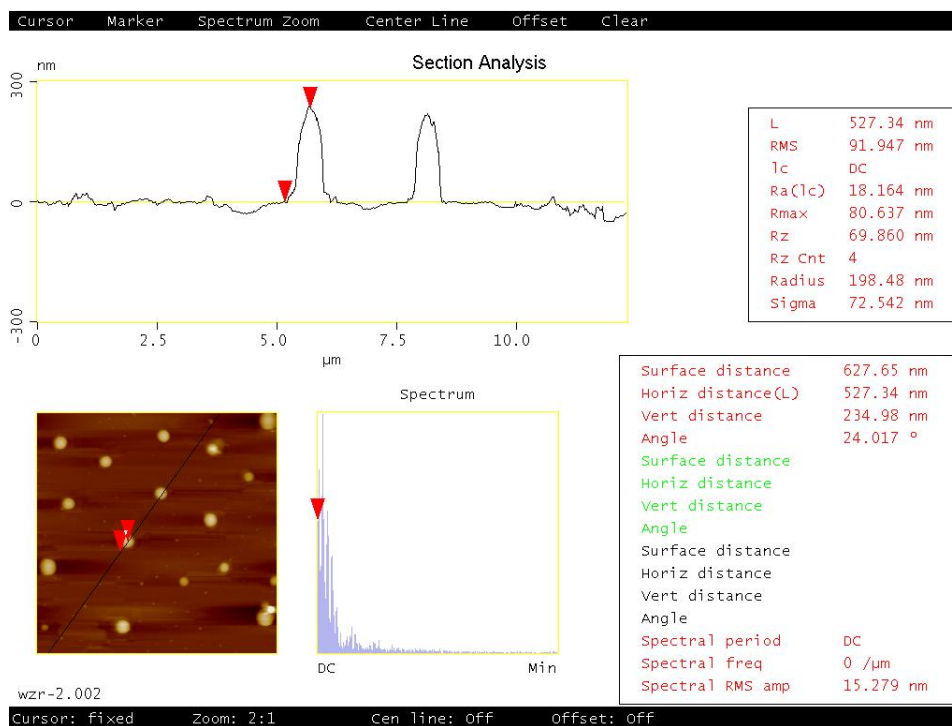

**Figure S8.** AFM height image ( $10 \times 10 \mu\text{m}$ ) recorded for supramolecularly cross-linked nanoparticles formed in the mixture of TPE-(B15C5)<sub>4</sub> ( $4.8 \mu\text{M}$ ) and  $\text{K}^+$  ions ( $19.2 \mu\text{M}$ ) in THF.

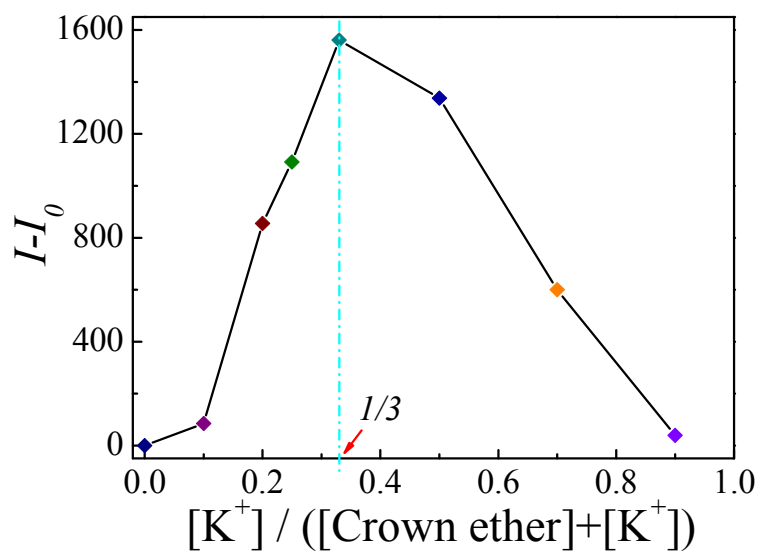

**Figure S9.** Job plot of crown ether moieties in TPE-(B15C5)<sub>4</sub> with K<sup>+</sup> ions. The total concentration of the host (crown ether) and guest (K<sup>+</sup> ions) in THF is 28.8 μM ( $\lambda_{ex} = 360$  nm,  $\lambda_{em} = 460$  nm; slit widths: Ex. 5 nm, Em. 5 nm; 25 °C).  $I_0$  and  $I$  represent the fluorescence intensities of TPE-(B15C5)<sub>4</sub> in THF in the absence and presence of varying amounts of K<sup>+</sup> ions respectively.
